# Supplementary material for: Carbodiimides – key mediators in the synthesis of novel cytotoxic and analgesic/antiinflammatory motifs based on α-amino-, enaminophosphonates, and azaphosphones
Source: Royal Society of Chemistry journal article supplement (doi:10.1039/c2ra22769j), 2012-11-14

**Carbodiimides-Key Mediated in Synthesis of Novel Cytotoxic and Analgesic/  
Antiinflammatory Motifs-Based  $\alpha$ -Amino-, Enaminophosphonates, and  
Azaphosphones**

**Wafaa M. Abdou,\* Reham F. Barghash, and Mohamed S. Bekheit**

*Chemical Industries Division, National Research Centre, Elbohouth St., D-12311, Dokki, Cairo,  
Egypt; \*correspondence: Wafaa Abdou; E-mail: [wabdou@link.net](mailto:wabdou@link.net)*

**Supporting Information**

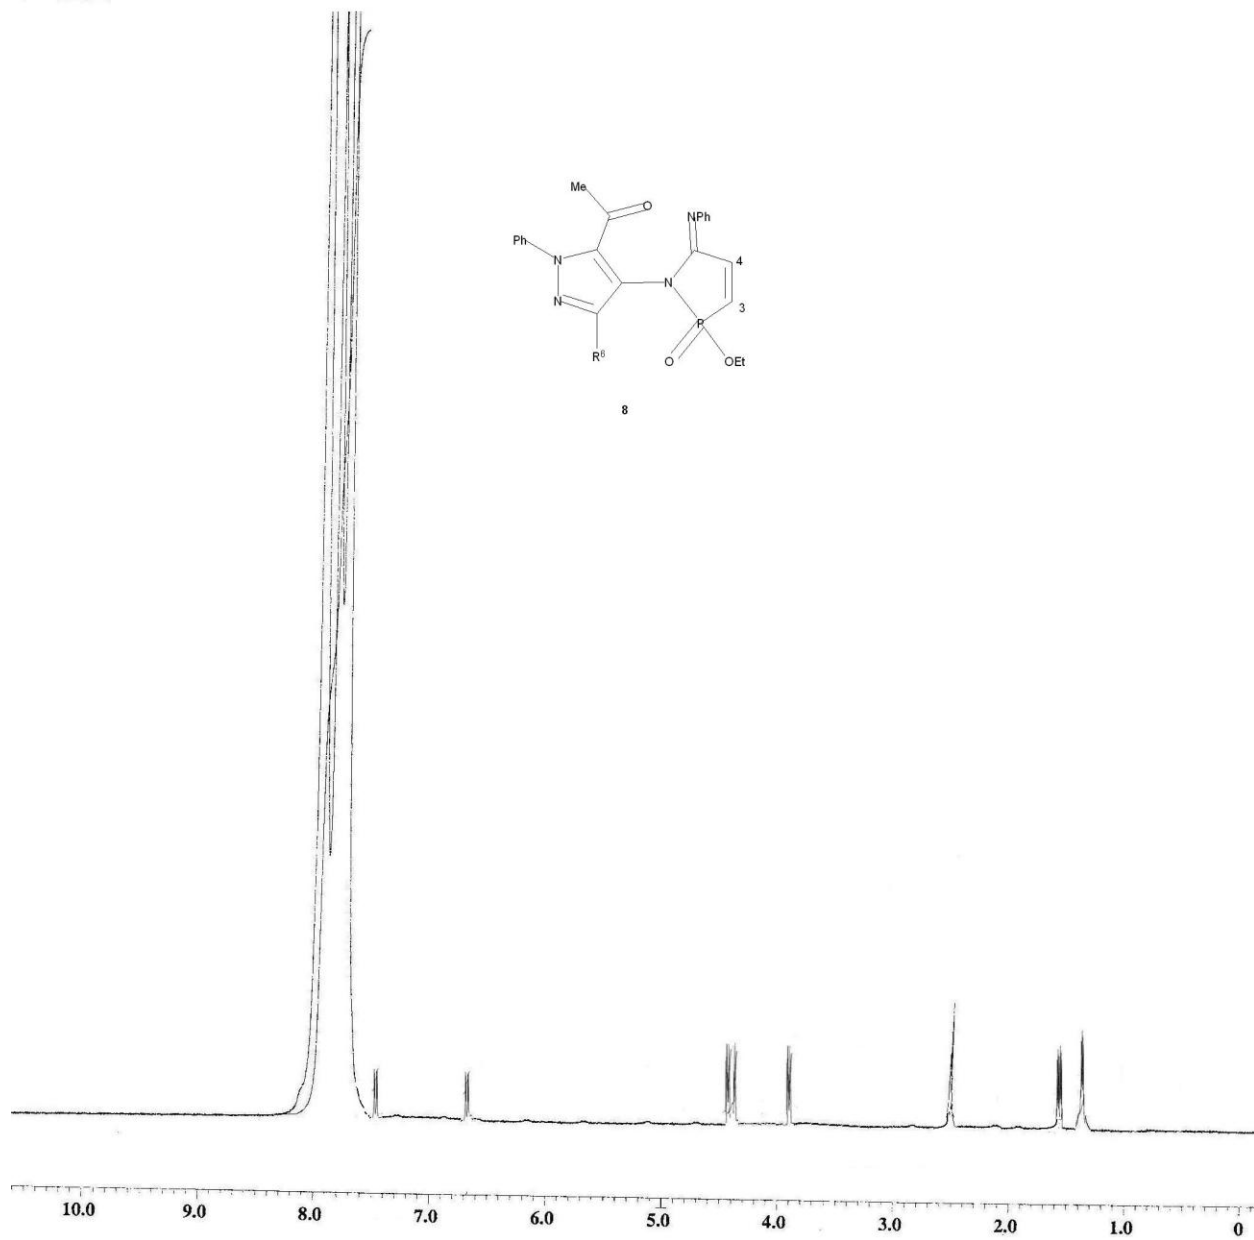

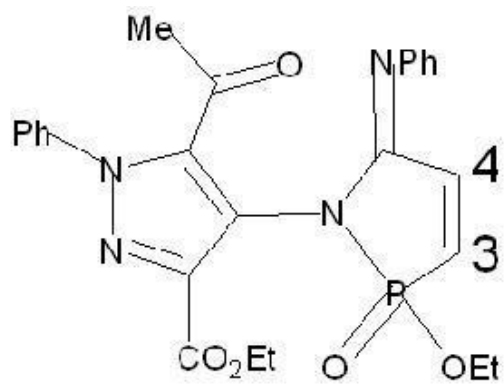

8

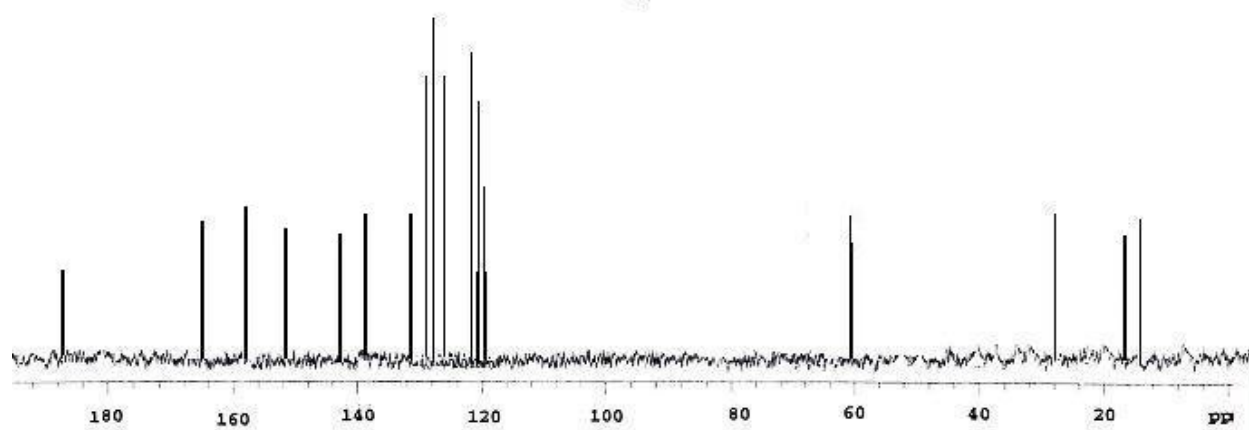

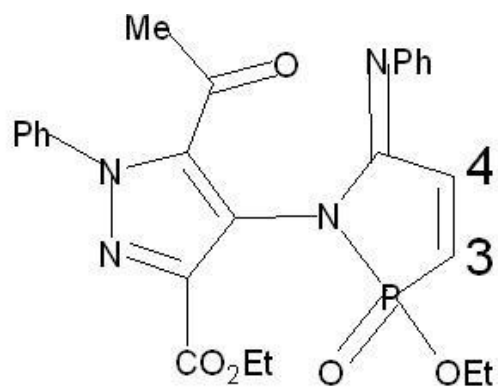

8

$\sigma_p = 14.8$  ppm

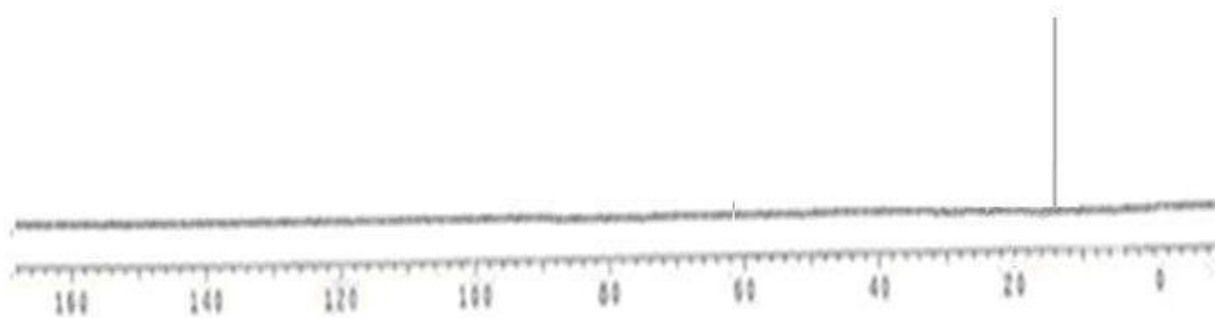

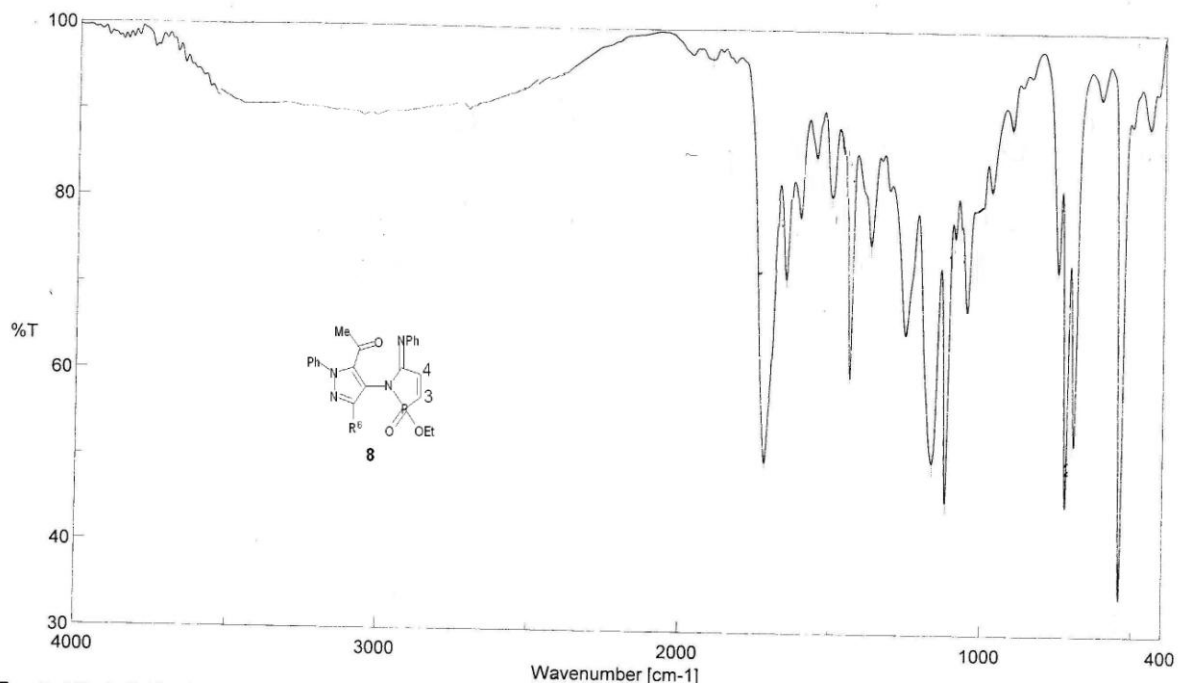

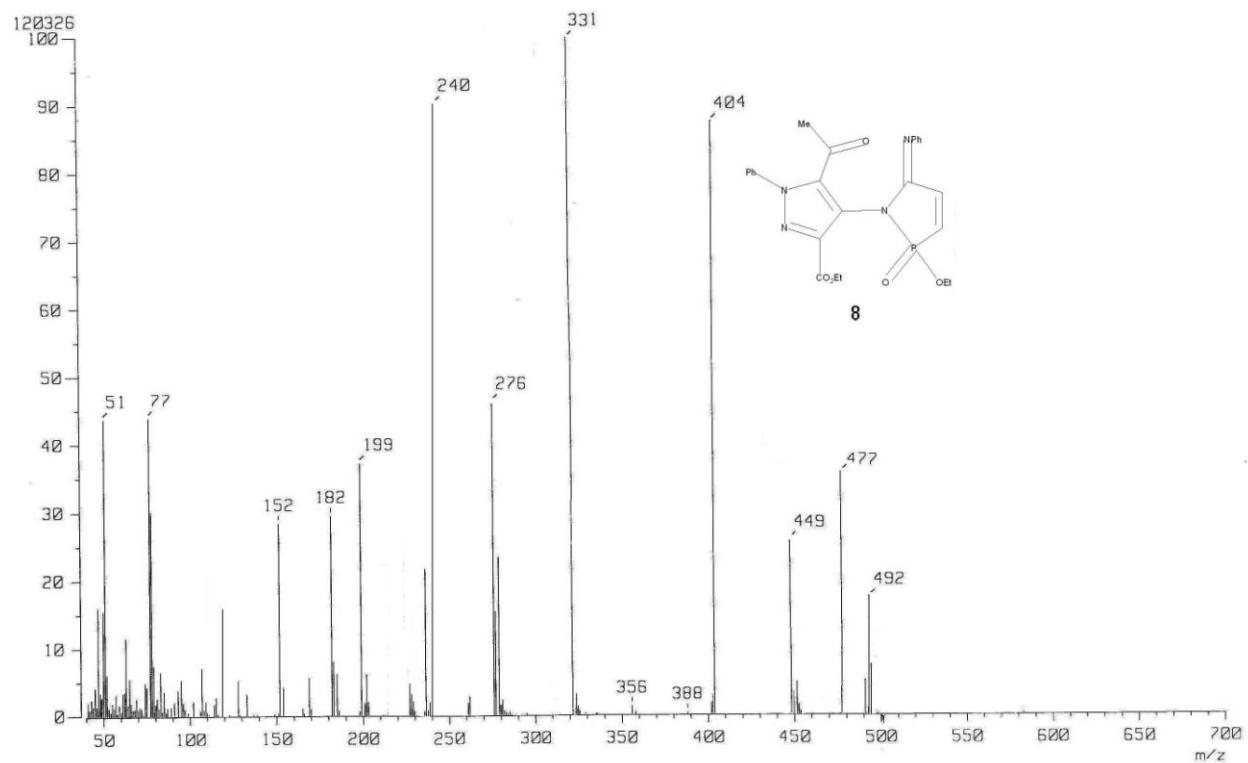

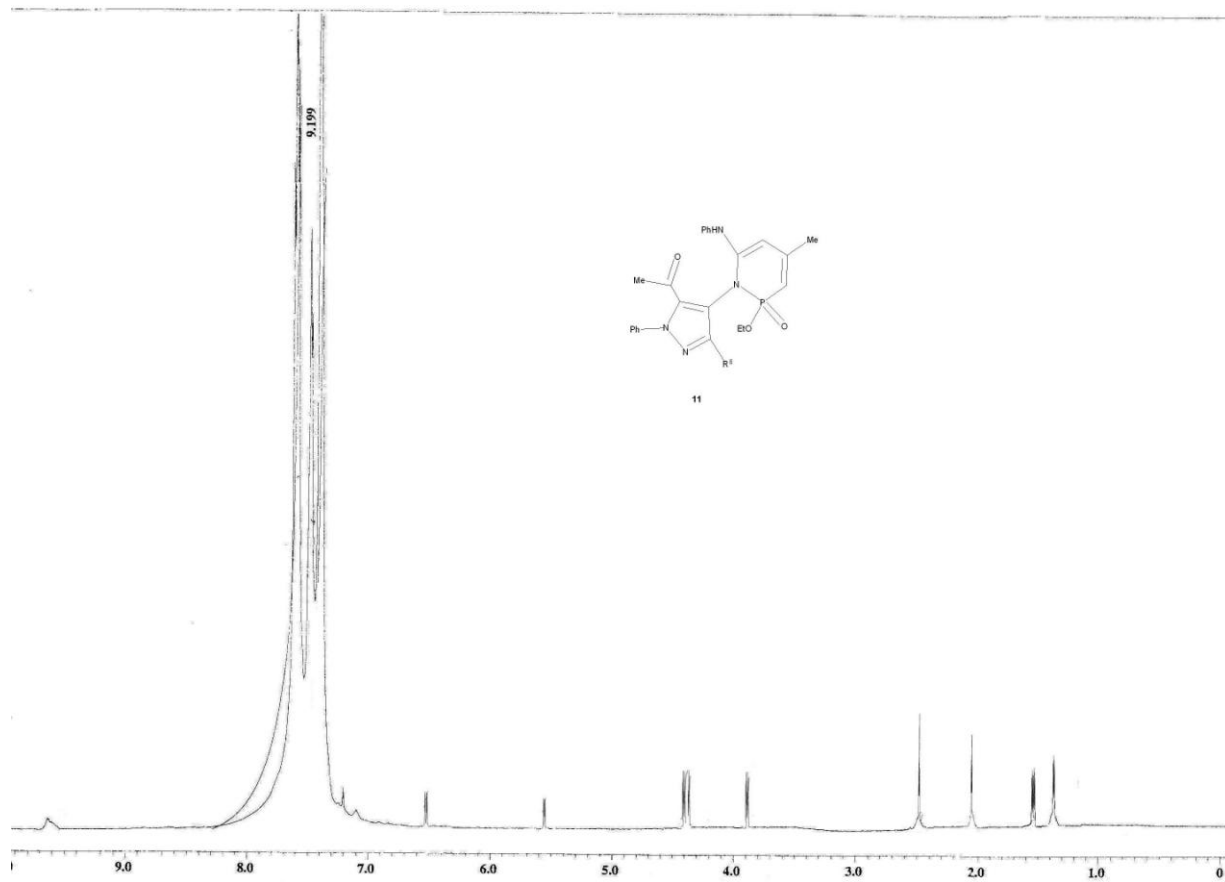

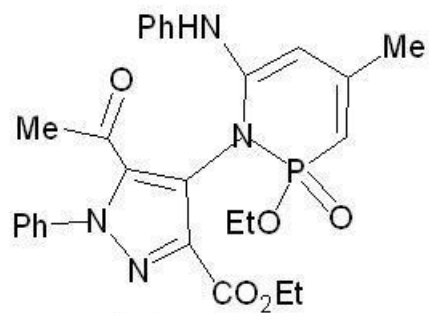

**11**

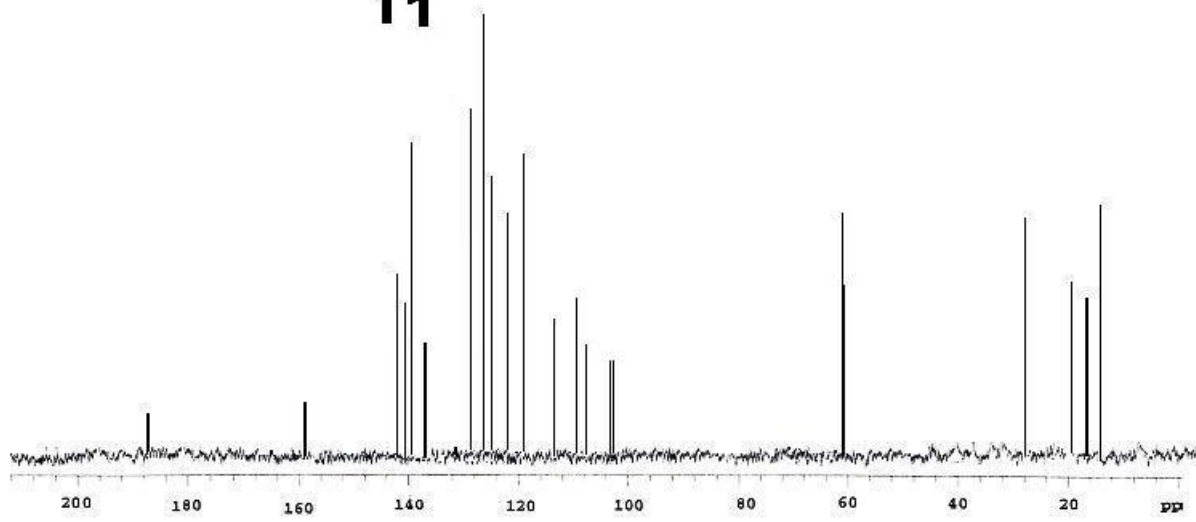



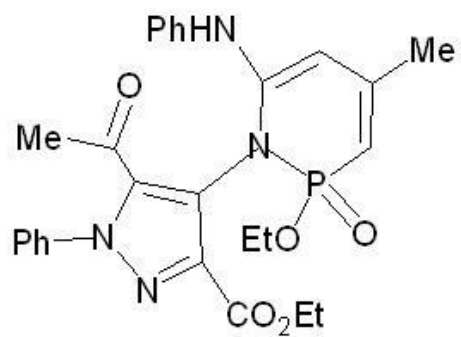

**11**

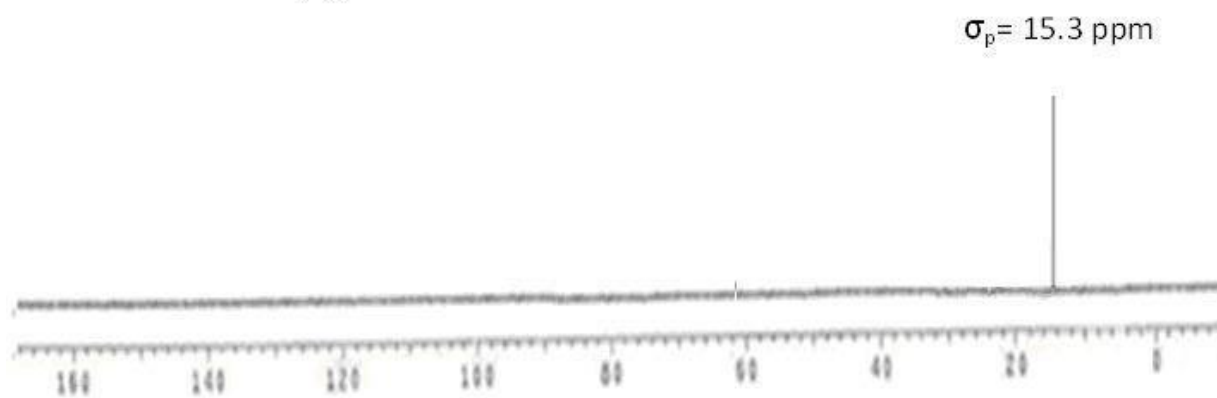

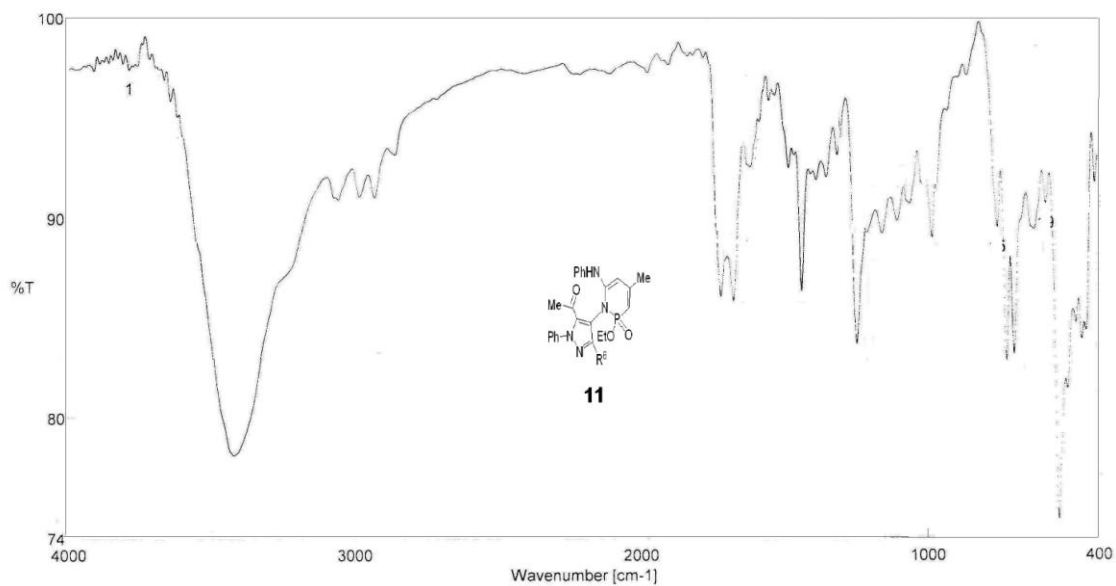

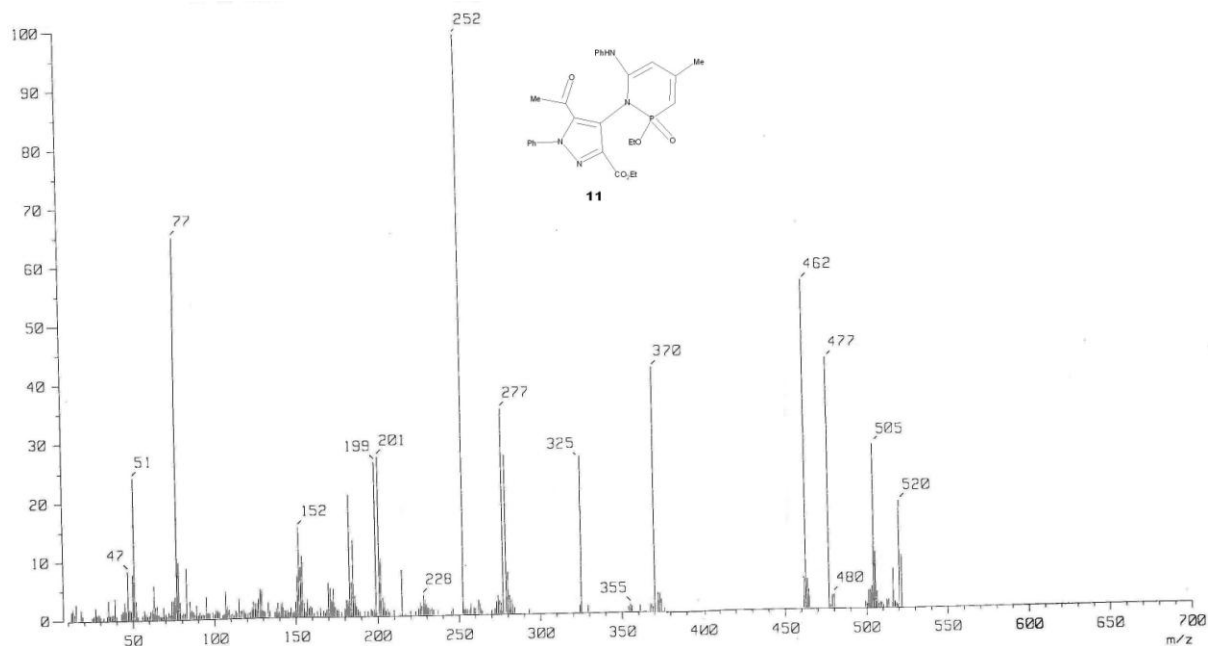

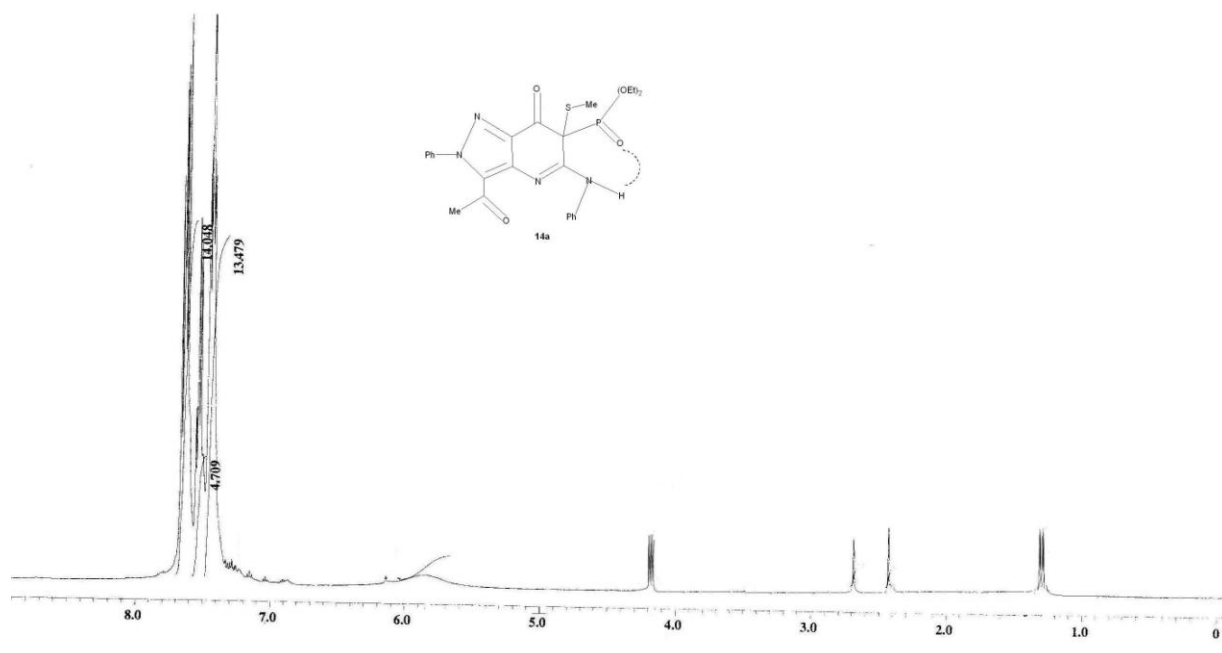

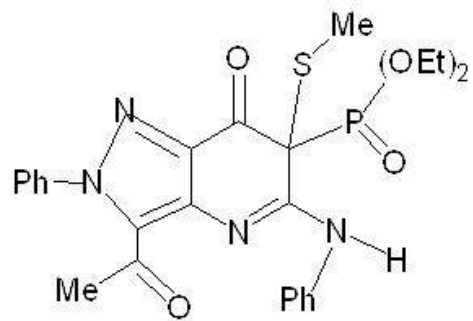

**14a**

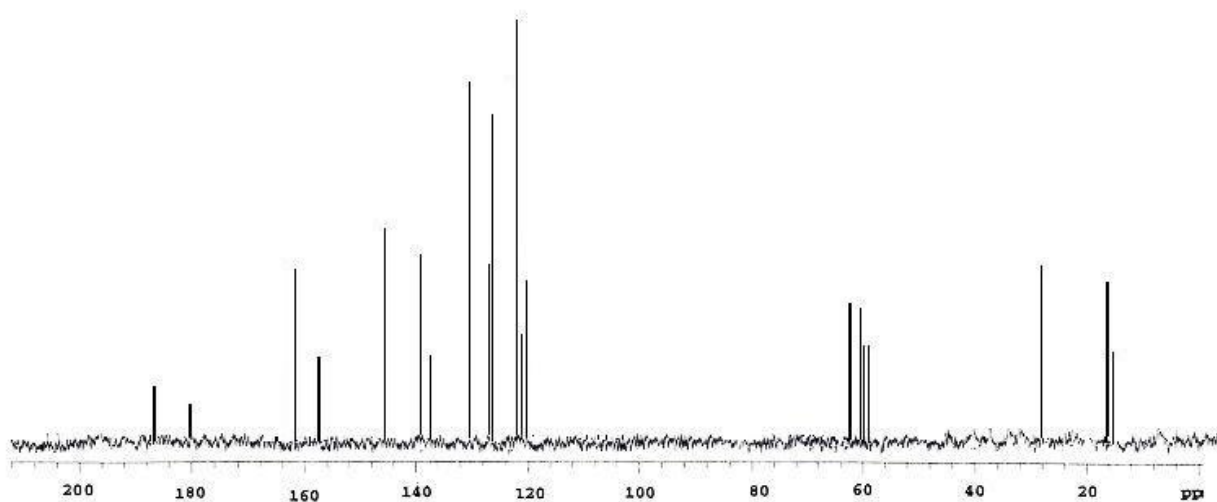

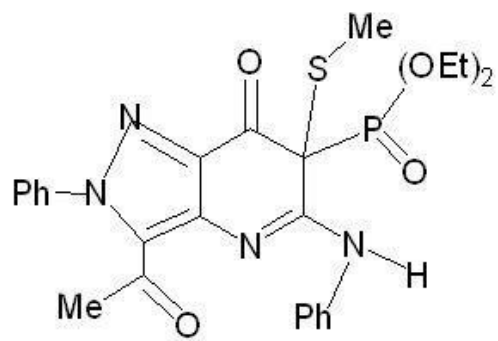

**14a**

$\sigma_p = 23.9$  ppm

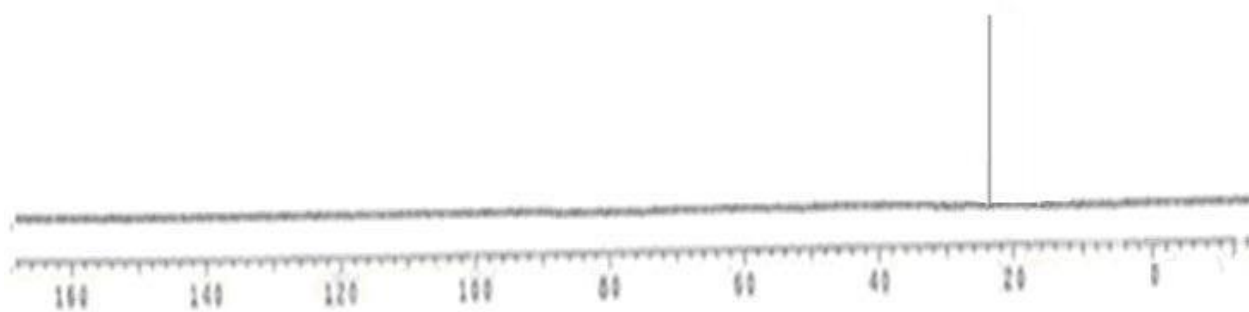

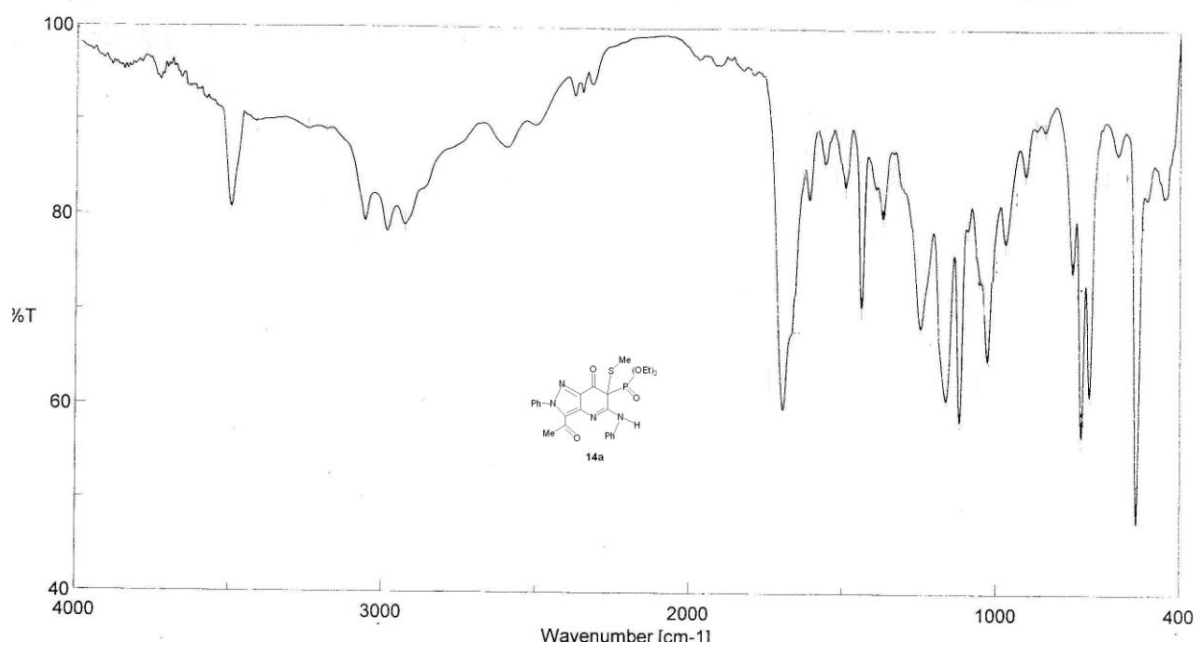

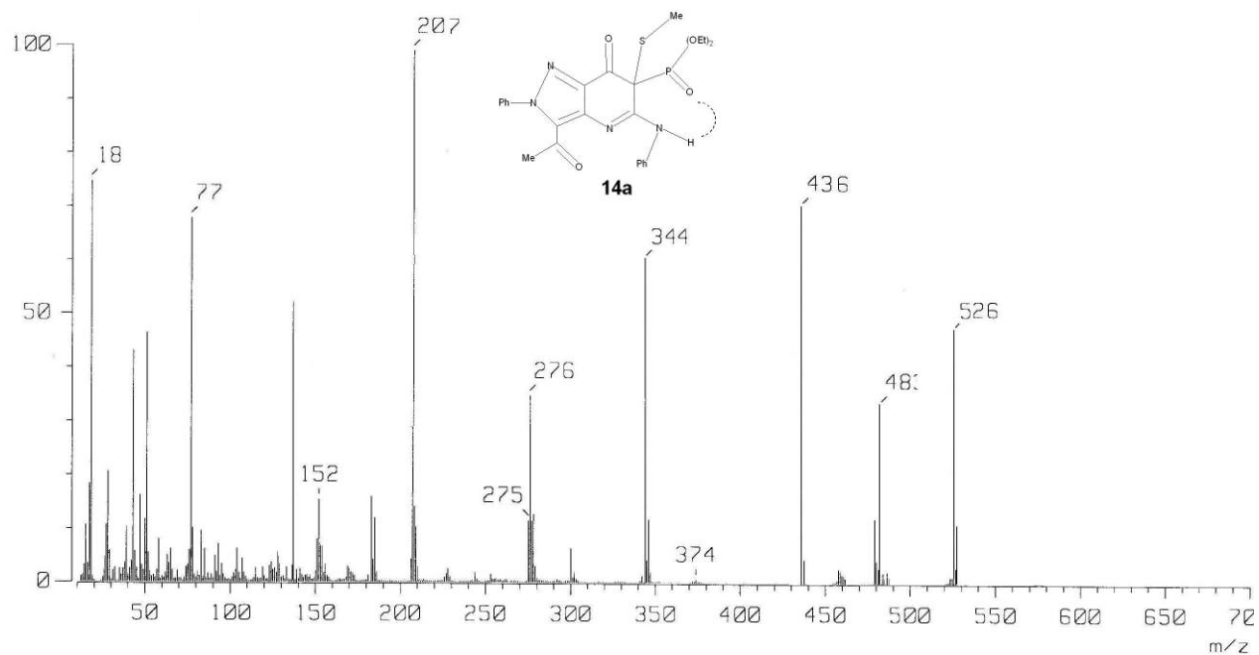



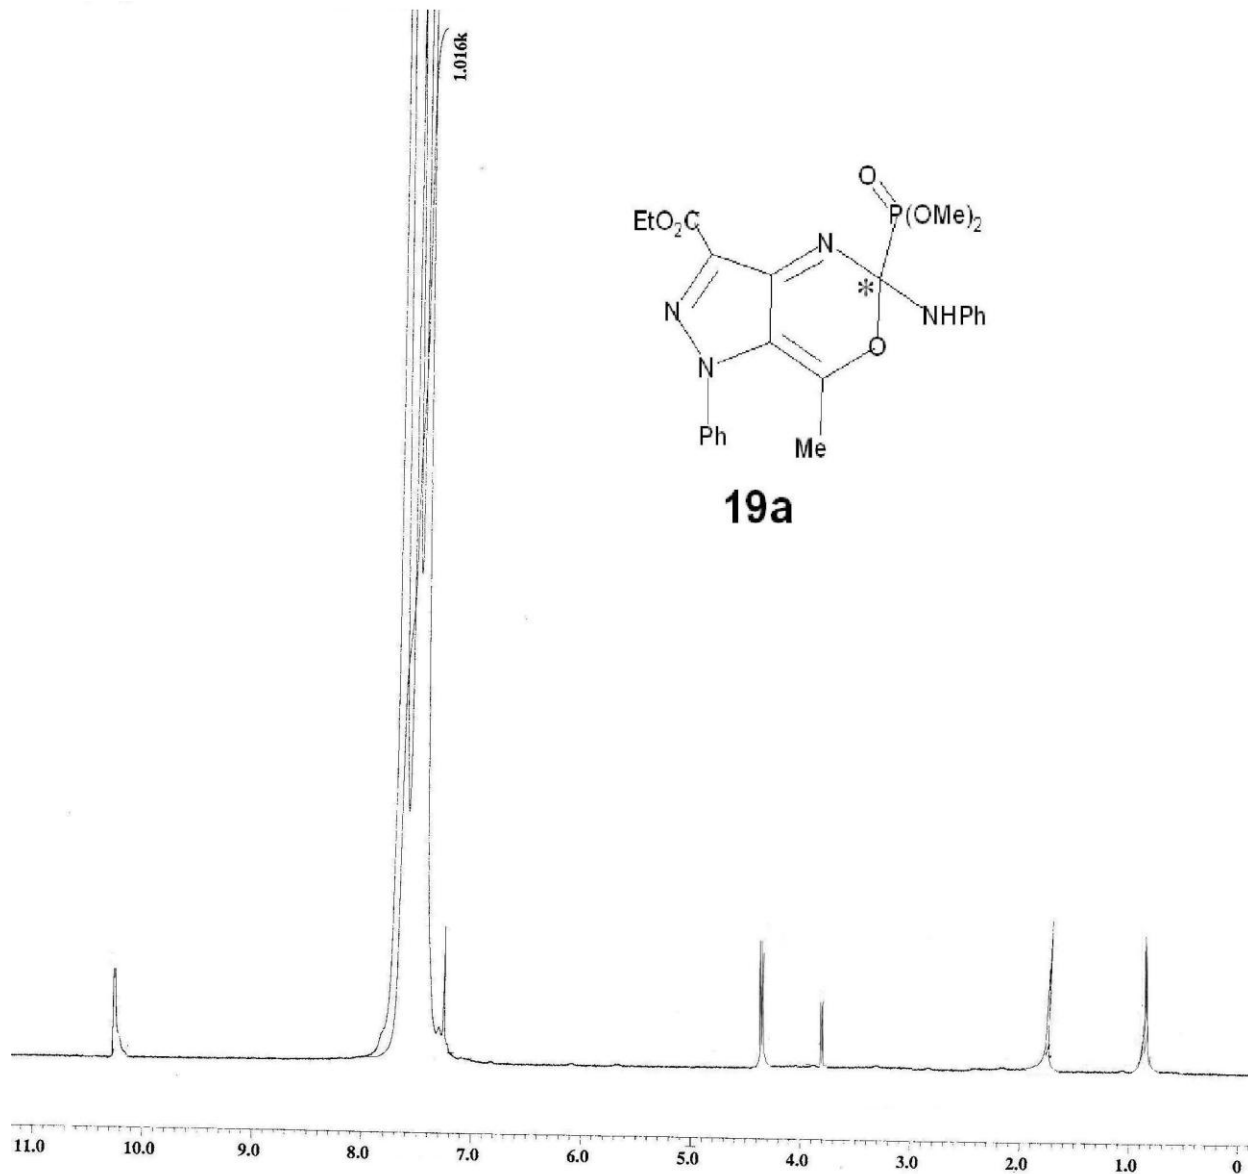

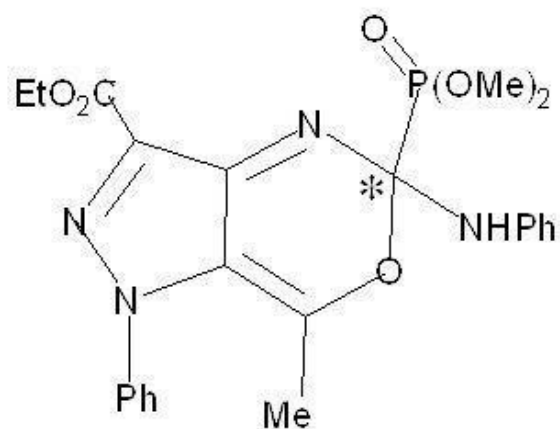

**19a**

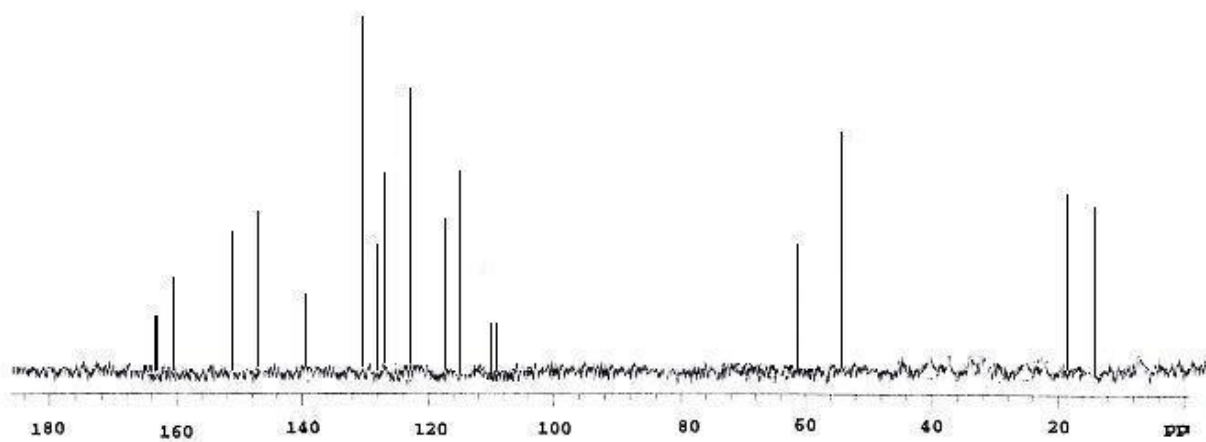

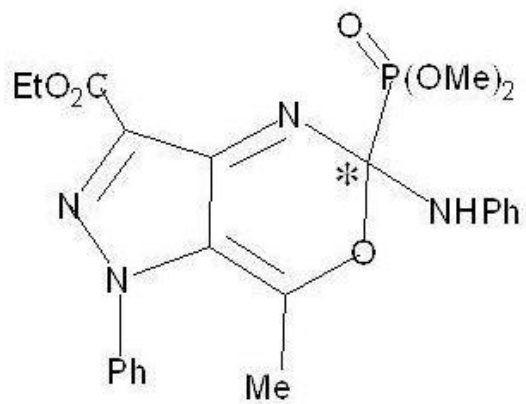

**19a**

$\sigma_p = 22.4$  ppm

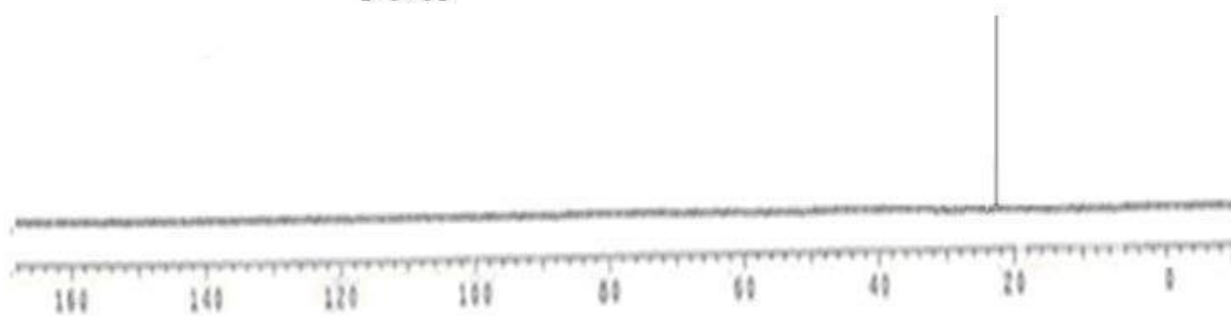

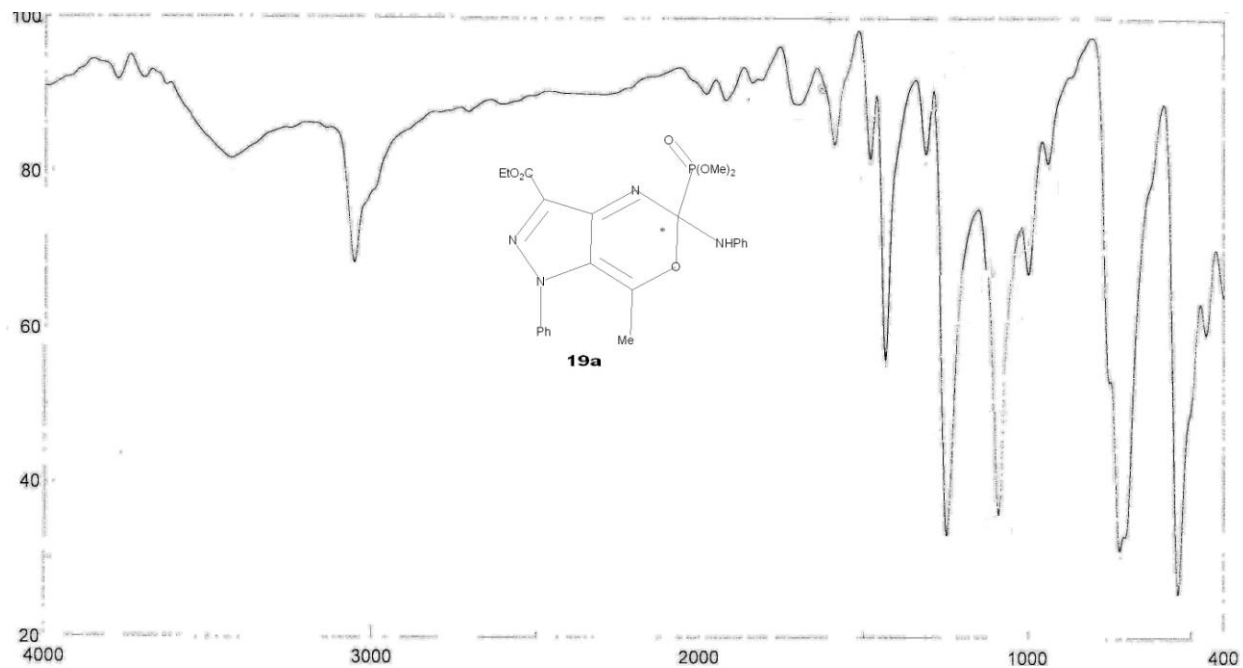

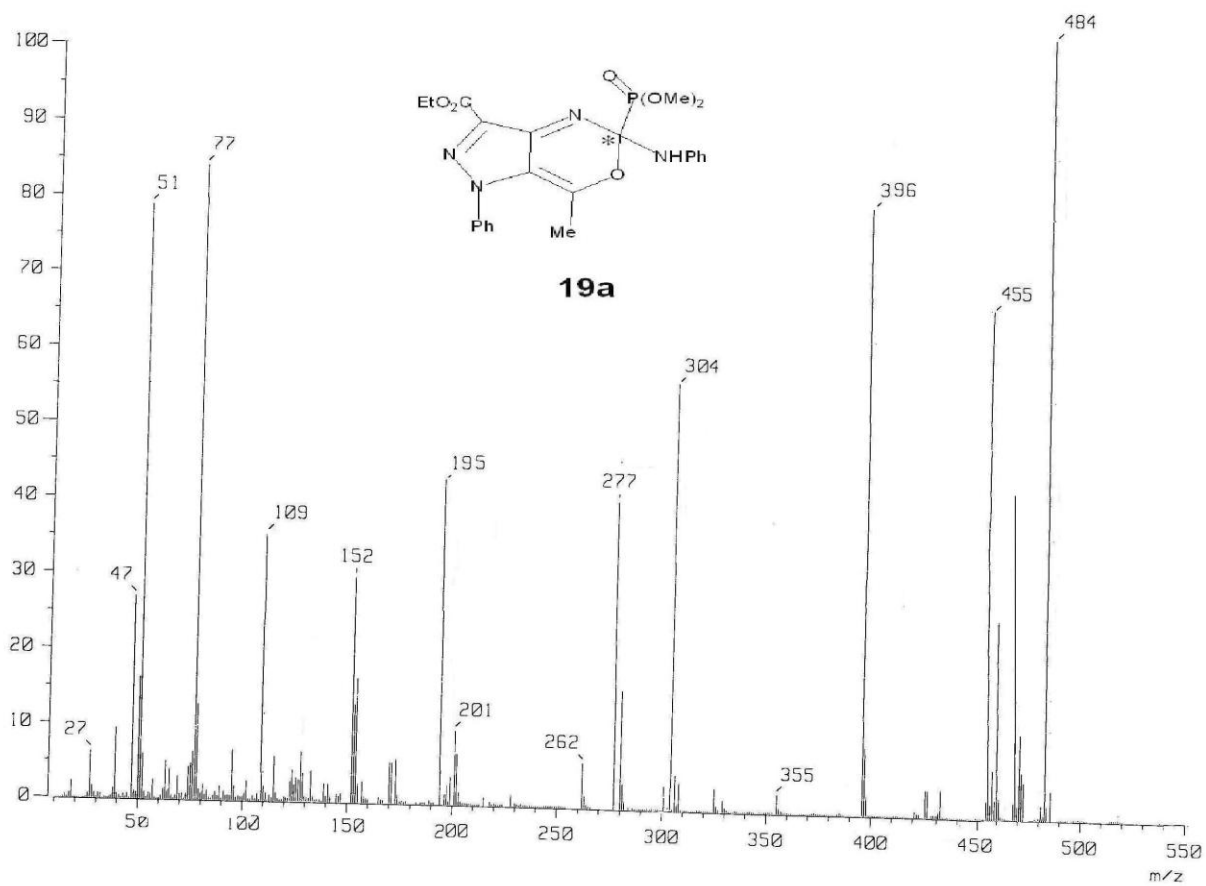

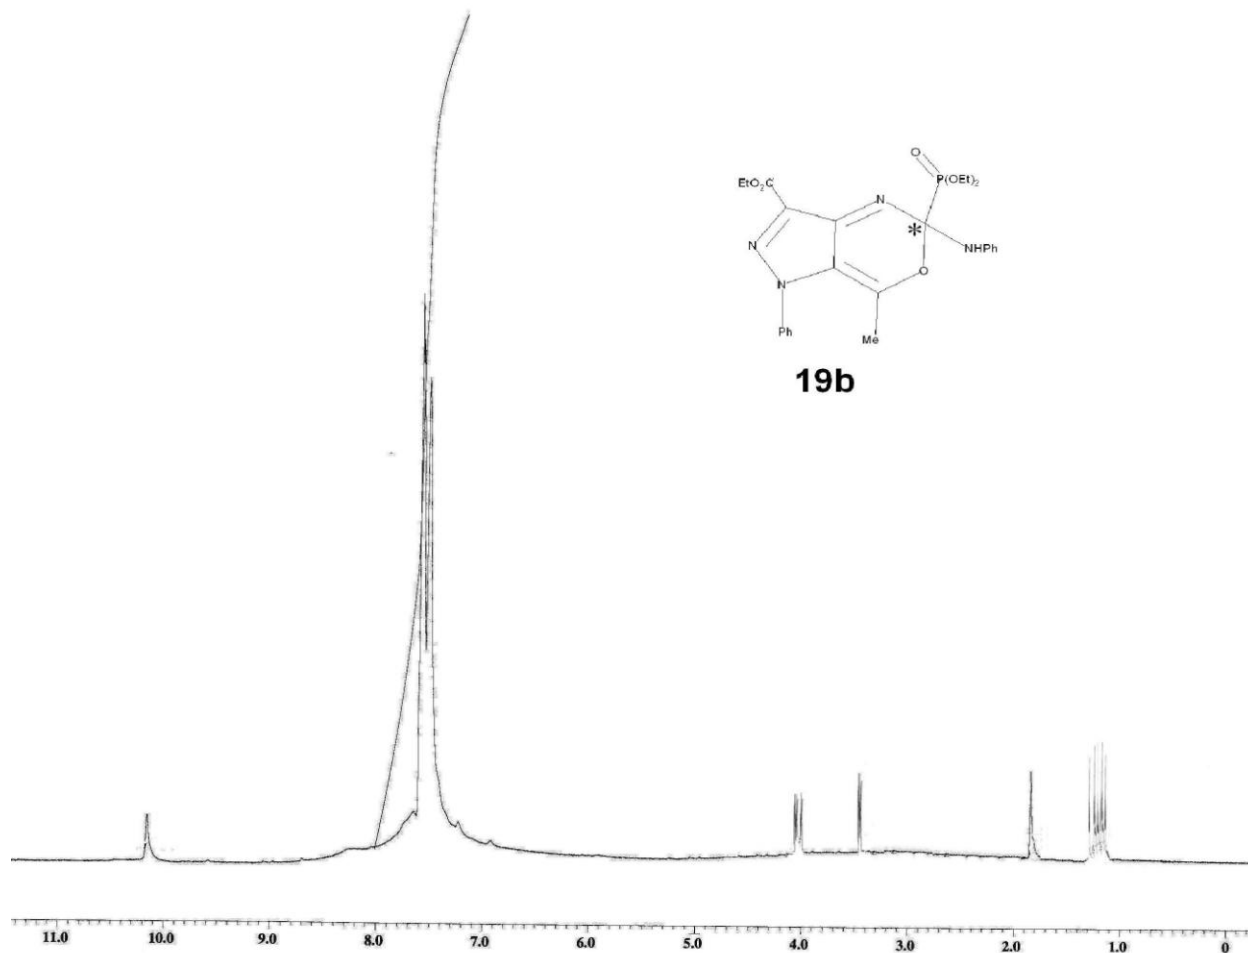

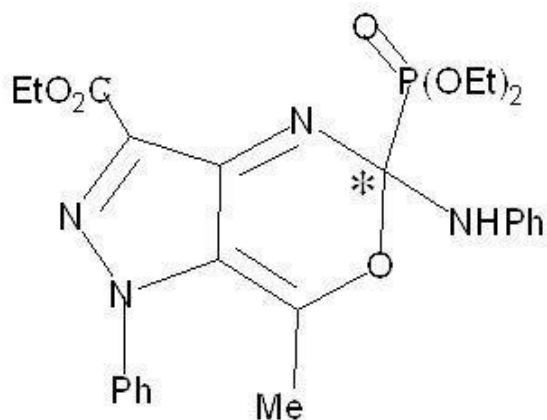

**19b**

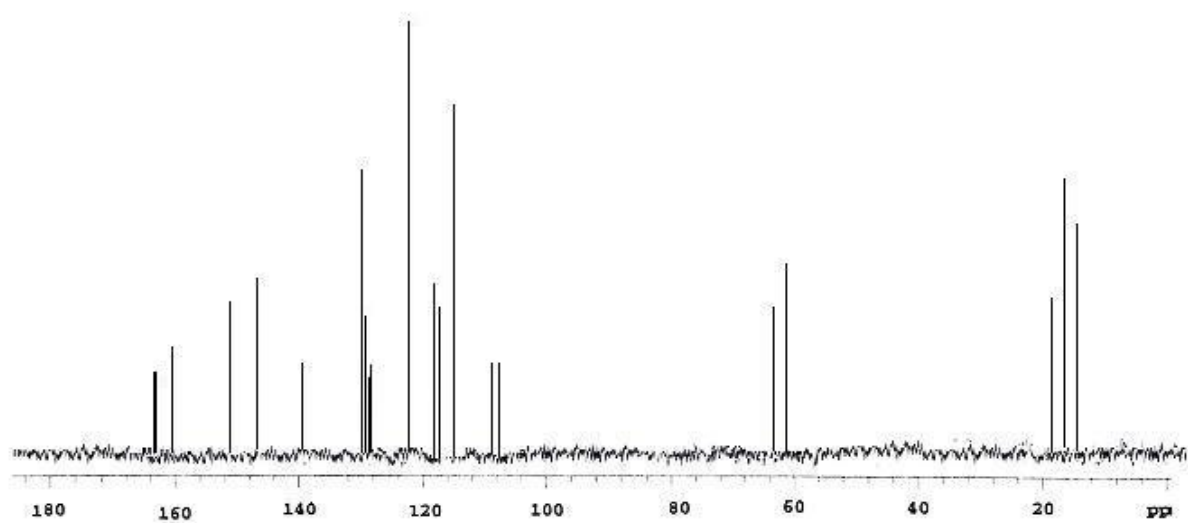

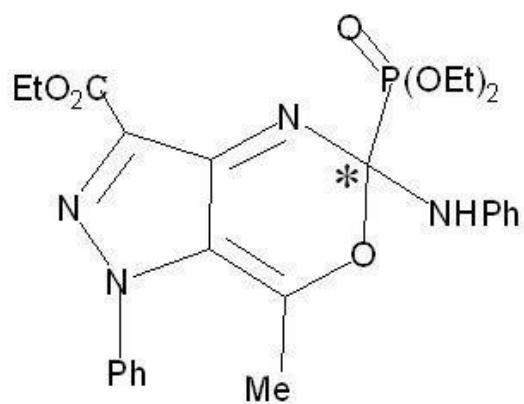

**19b**

$\sigma_p = 23.5$  ppm

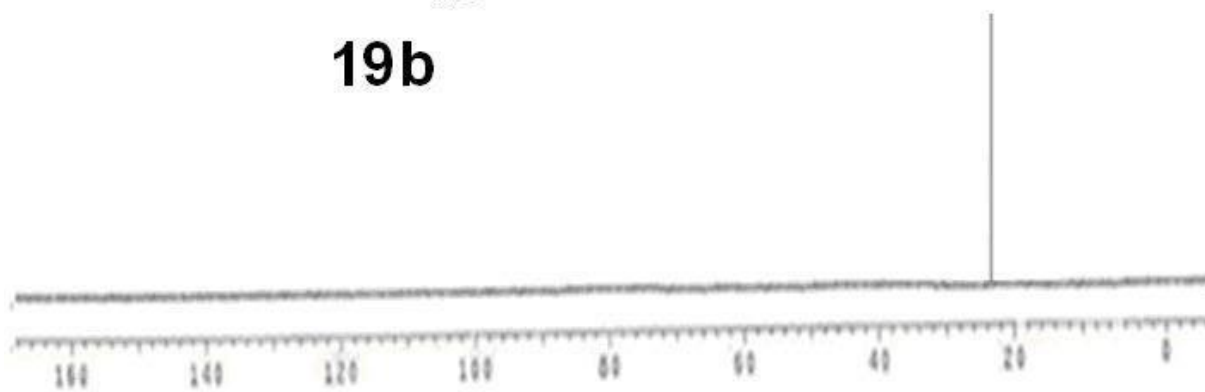



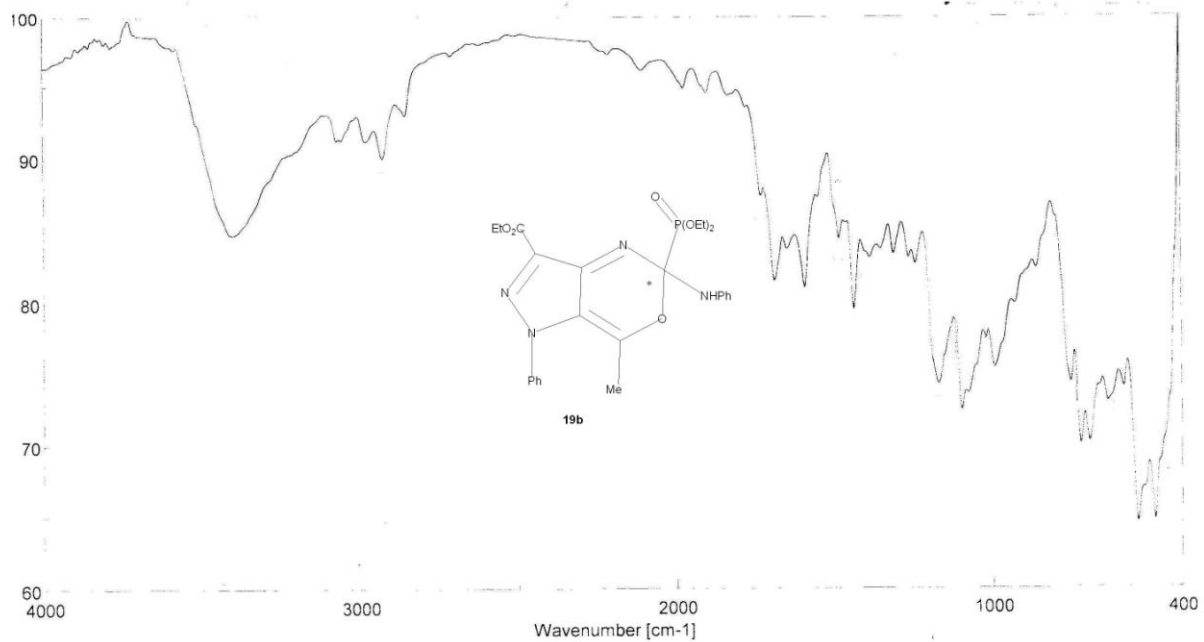

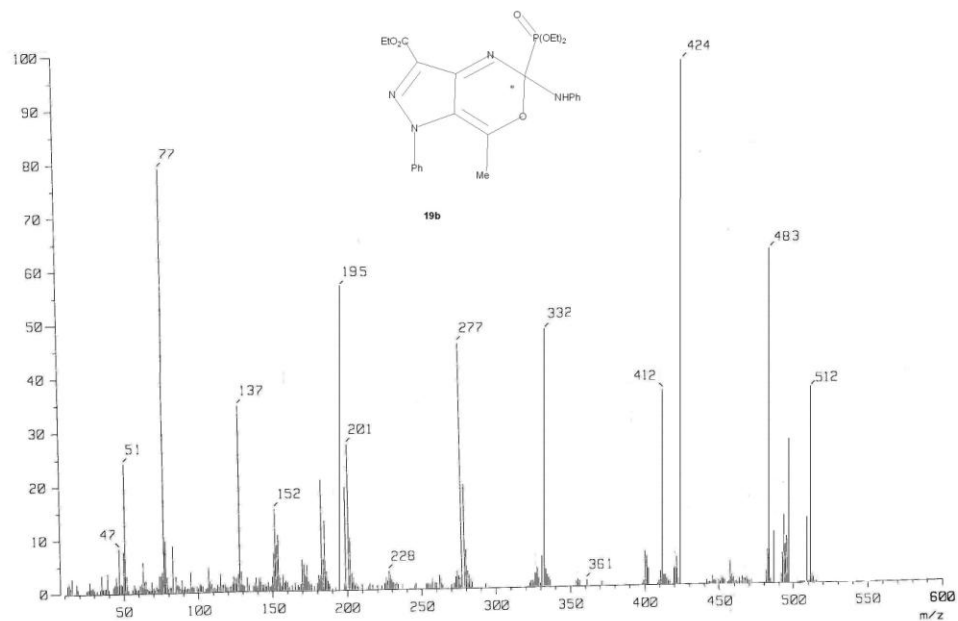

Supplement: c2ra22769j.pdf [file c2ra22769j.pdf]
